# Supplementary material for: Mesothelioma survival prediction based on a six-gene transcriptomic signature
Source: PubMed Central journal article supplement — iScience. 2024 Sep 23;27(10):111011. doi: 10.1016/j.isci.2024.111011 (PMC11519557; doi:10.1016/j.isci.2024.111011), 2024-09-23
Supplement: mmc1.pdf [file mmc1.pdf]

## **Supplemental information**

### **Mesothelioma survival prediction based on a six-gene transcriptomic signature**

**Kiarash Behrouzfar, Steve E. Mutsaers, Wee Loong Chin, Kimberley Patrick, Isaac Trinstern Ng, Fiona J. Pixley, Grant Morahan, Richard A. Lake, and Scott A. Fisher**

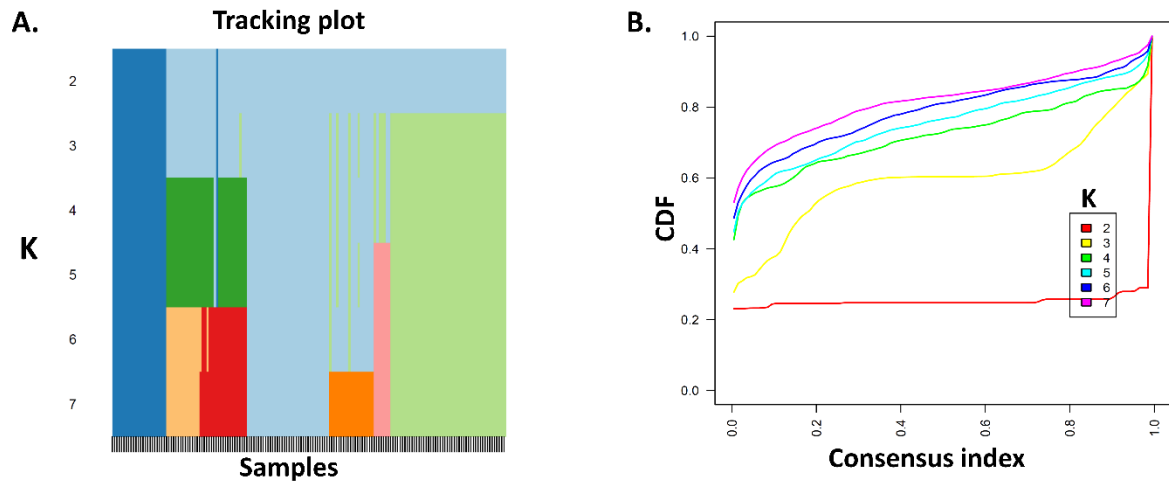

**Fig. S1. Identification of the optimal cluster number using the Consensus clustering methodology** (A) Tracking bar graph shows the distribution of samples (columns) across different cluster number or K value (rows). Less changing colours within a row (K) indicates the stability of that cluster number (K) compared to other cluster number. (B) Cumulative distribution function (CDF) curves are shown in different colours for each cluster number assignment. A cluster number curve with the lowest alterations is considered the most stable cluster number.

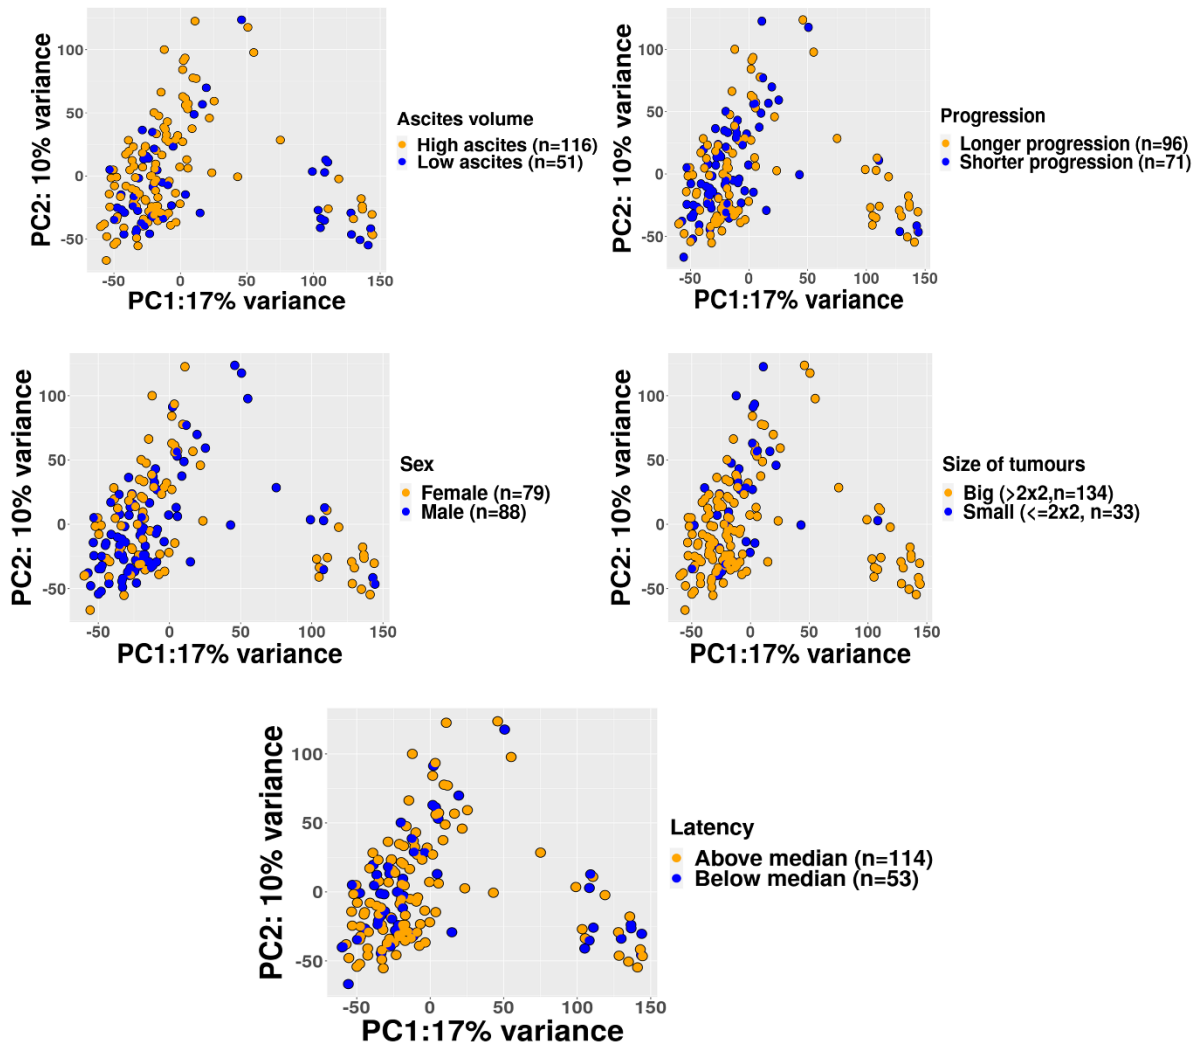

**Fig. S2. PCA plots of RNA sequencing data. CC-MexTag phenotypic traits did not demonstrate any association with tumour gene expression profiles. Each dot represents an individual tumour and colour coded based on the respective trait for each PCA plot.**

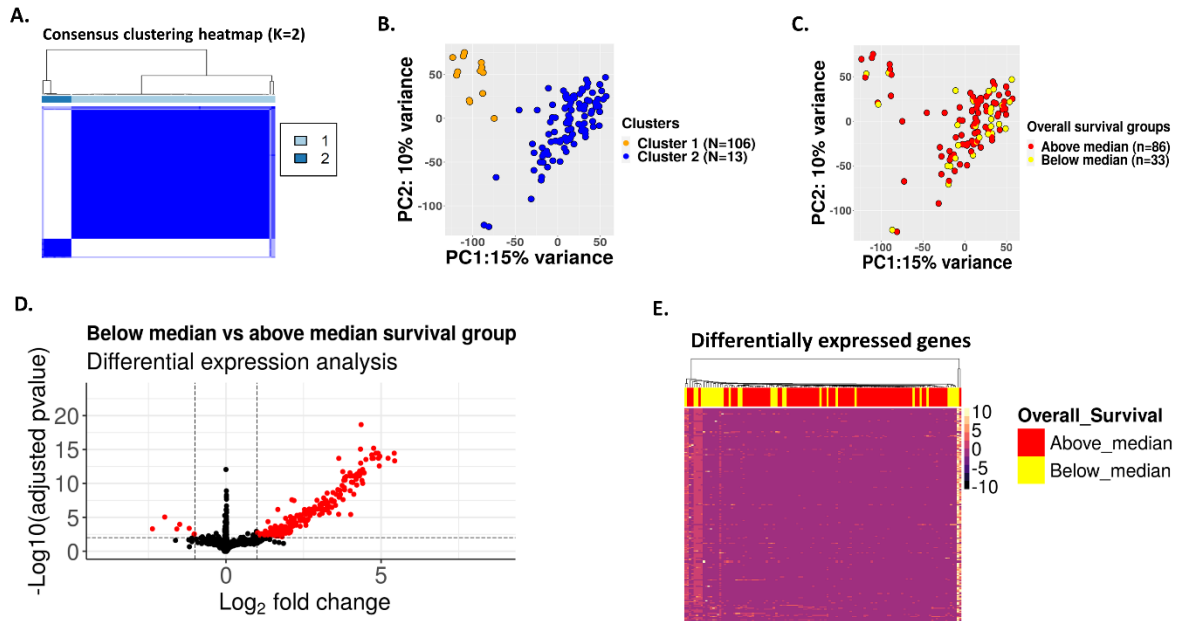

**Fig. S3. Gene expression analysis using a single tumour from each mouse demonstrated two distinct tumour clusters that were not associated with overall survival of CCMT mice.** (A) Hierarchical Consensus clustering heatmap generated from ConsensusClusterPlus package for K=2 selected based on the minimum overlap between two clusters using the 5000 most highly variable genes from RNAseq data. (B) Principal component analysis (PCA) plot of RNAseq data coloured based on consensus clustering. (C) PCA plot of single mouse tumours coloured in red and yellow corresponding to above median and below median survival groups, respectively. (D and E) Volcano plot and heatmap of differentially expressed genes in tumours from below median survival group versus above median survival group.

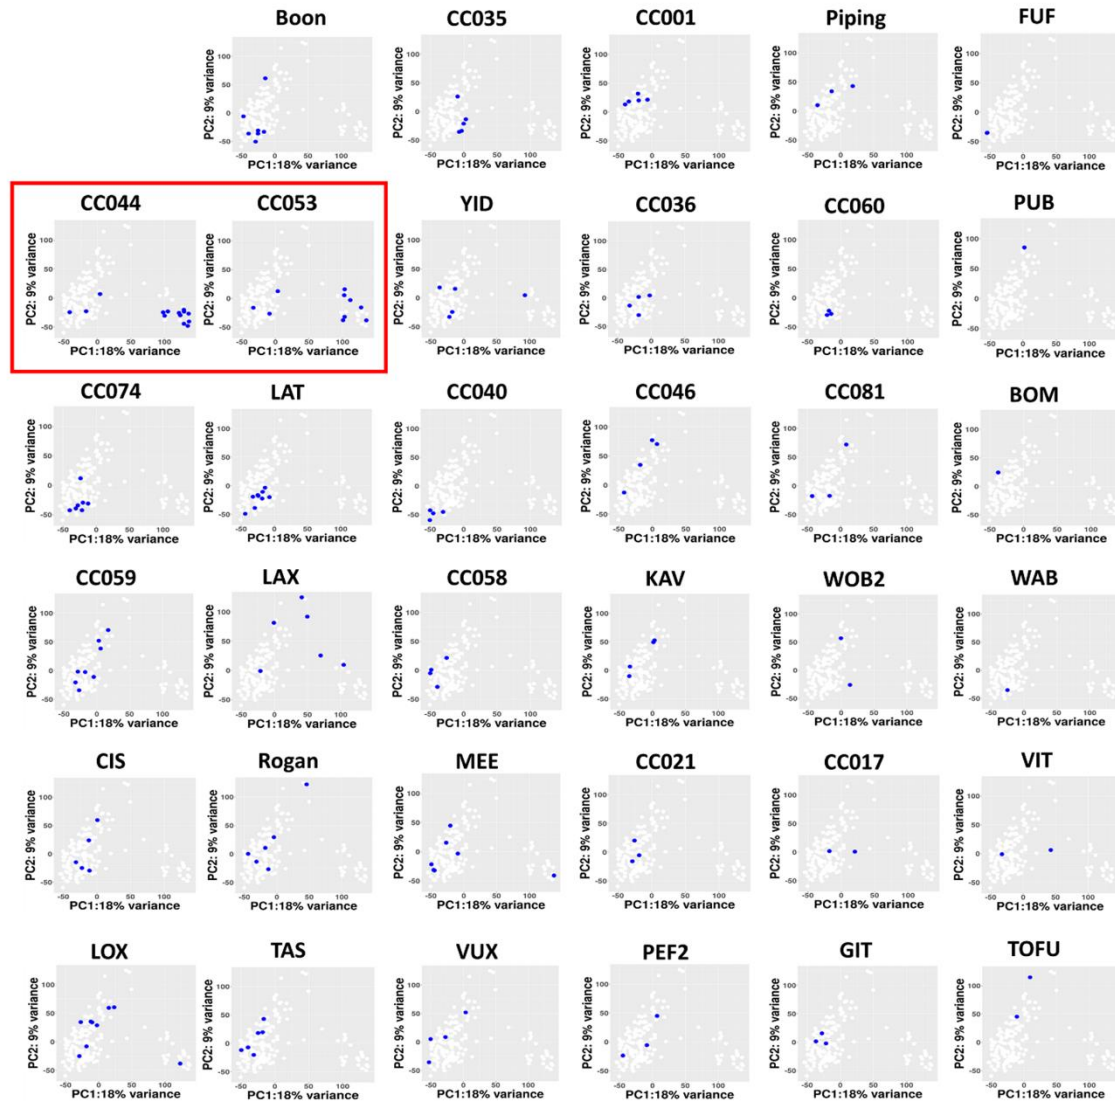

**Fig. S4. Cluster 2 (immune) tumours are predominantly from CC044 and CC053 CCMT strains.** CCMT stain specific PCA plots are shown. All dots from the same strain are coloured in blue. PCA plots highlighted by red outline indicate mouse strains where their tumours predominately constitute the distinct cluster (Cluster 2).

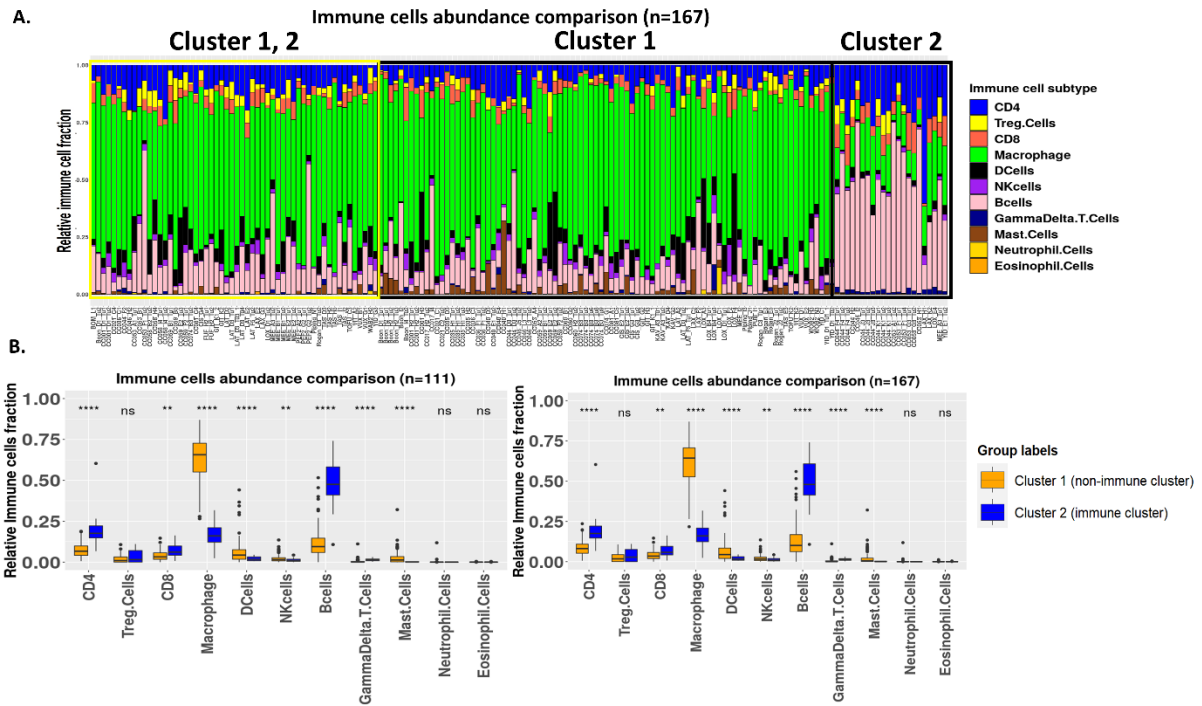

**Fig. S5. Comparison of CCMT tumour cluster immune cell abundance.** (A) CIBERSORT results of all 167 samples. All samples selected by Yellow rectangle correspond to samples with low deconvolution confidence of CIBERSORT algorithm,  $p \geq 0.05$ . All immune cell types are shown in different colours. (B) Comparison between the number of immune cells in Cluster 1 and Cluster 2 tumours. Box plots on the left represent immune cells fractions using samples with significant deconvolution confidence (n=111), while Box plots on the right represent immune cells fraction using all samples (n=167). All immune cells except Treg, neutrophils and eosinophiles shown by 'ns' are significantly different between Cluster 1 and 2 using student T test. P value less than 0.05 was considered significant.  $P < 0.05$  \*,  $P < 0.01$  \*\*,  $P < 0.001$  \*\*\*,  $P < 0.0001$  \*\*\*\*. ns = not significant. Box and whiskers plots show median and interquartile range.

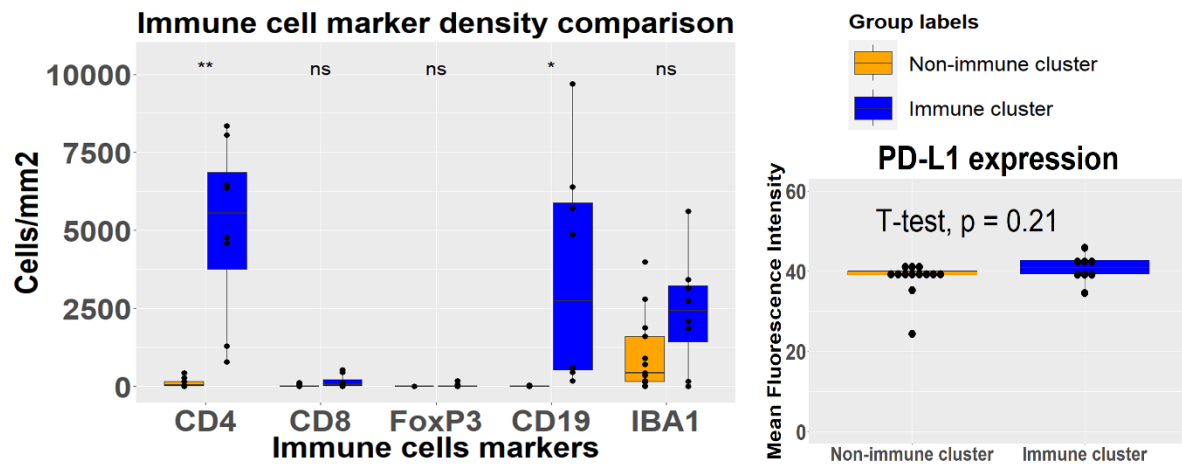

**Fig. S6. Tumours from Cluster 2 (immune cluster) had significantly higher infiltration of CD4+ T and CD19+ B cells compared to Cluster 1 (non-immune cluster).** Quantification of immune cell density and PD-L1 expression in whole tumour sections from immune and non-immune clusters. Density of cells expressing CD4, CD8 and FoxP3 as T cells markers, CD19 as B cell marker and IBA1 as pan macrophage marker, expressed as cells/mm<sup>2</sup>. Expression of PD-L1 was measured in Mean Fluorescence Intensity (MFI).  $P < 0.05$  was considered significant. Box and whiskers plots show median and interquartile range.

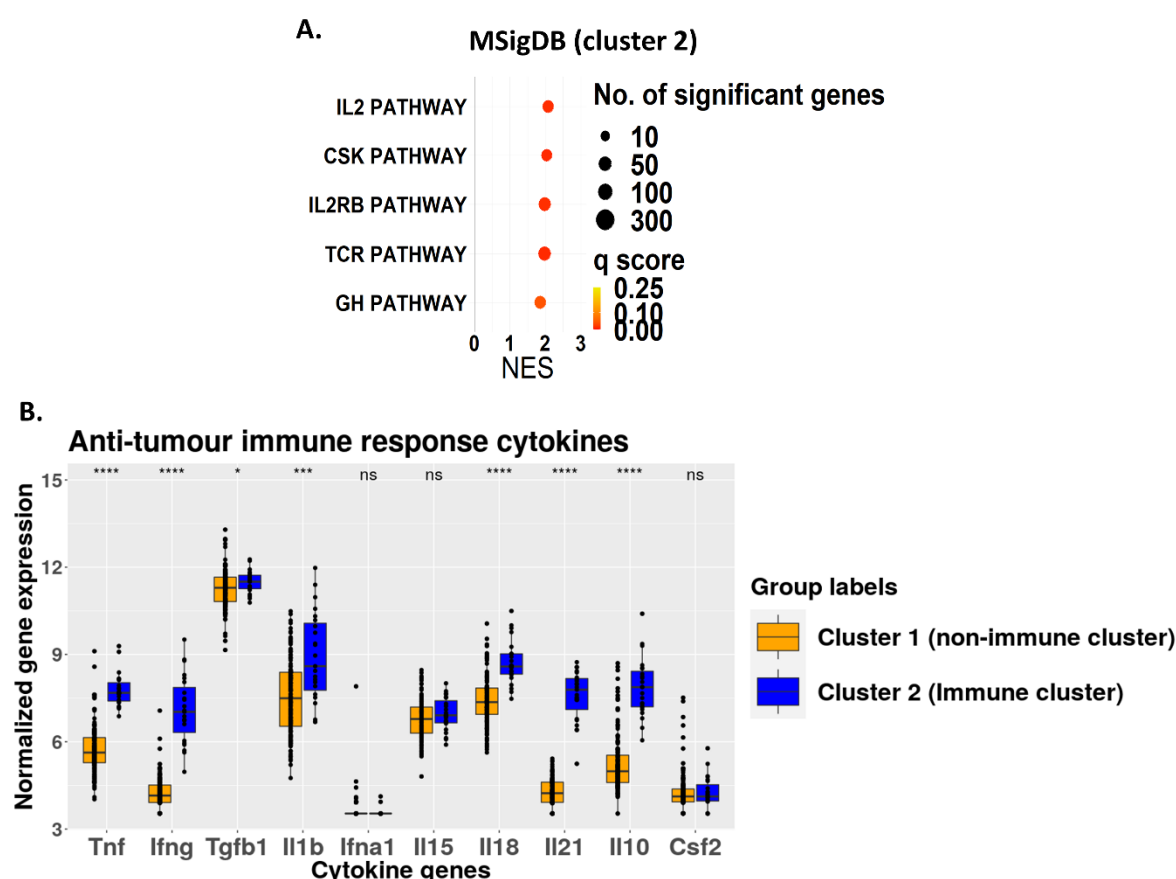

**Fig. S7. Cytokines associated with anti-tumour immune responses were highly expressed in the gene expression profile of immune cluster tumours. (A)** Gene set enrichment analyses (GSEA) depicting the top 5 significant gene sets enriched in tumours from immune cluster (Cluster 2) using BioCarta database. The number of genes per gene set is represented by the size of circles and the colour of the circle corresponds to the q score (false discovery rate) value for each gene set signature. **(B)** Box plots of normalised gene expression to compare the expression of 10 cytokine genes associated with anti-tumour immune response between immune and non-immune cluster tumours.  $P < 0.05$  was considered significant.  $P < 0.05$  \*,  $P < 0.01$  \*\*,  $P < 0.001$  \*\*\*,  $P < 0.0001$  \*\*\*\*. Box and whiskers plots show median and interquartile range.

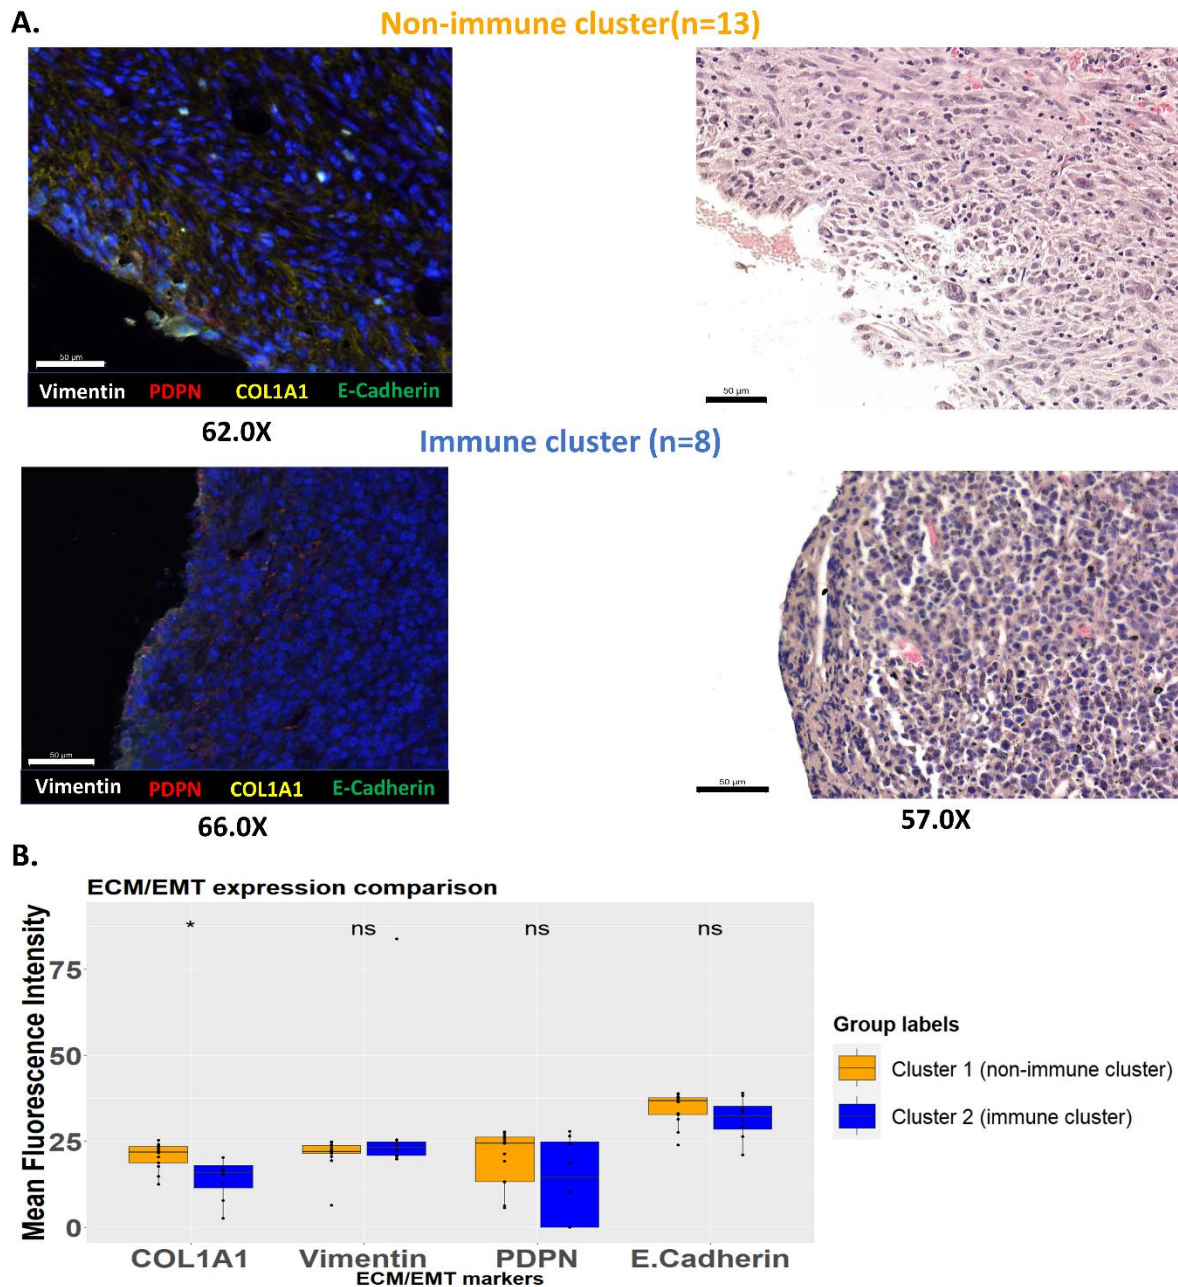

**Fig. S8. Cluster 1 (non-immune) tumours expressed significantly higher levels of COL1A1 compared to Cluster 2 (immune) tumours.** (A) Representative immunofluorescence and Haemotoxylin and Eosin (H&E) images of Panel 3 markers (Table S1) comparing the expression of epithelial mesenchymal transition (EMT) and extracellular matrix (ECM) markers of tumours from immune and non-immune (EMT/ECM) clusters identified in RNAseq data of CCMT mice tumours. (B) Immunofluorescence analysis of EMT and ECM markers between immune (Blue) and non-immune (orange) tumours. Mean Fluorescence Intensity (MFI) was used to compare the expression of each marker. Student T-test was calculated and  $P < 0.05$  was considered significant. Scale bars equal 50 µm. Box and whiskers plots show median and interquartile range.

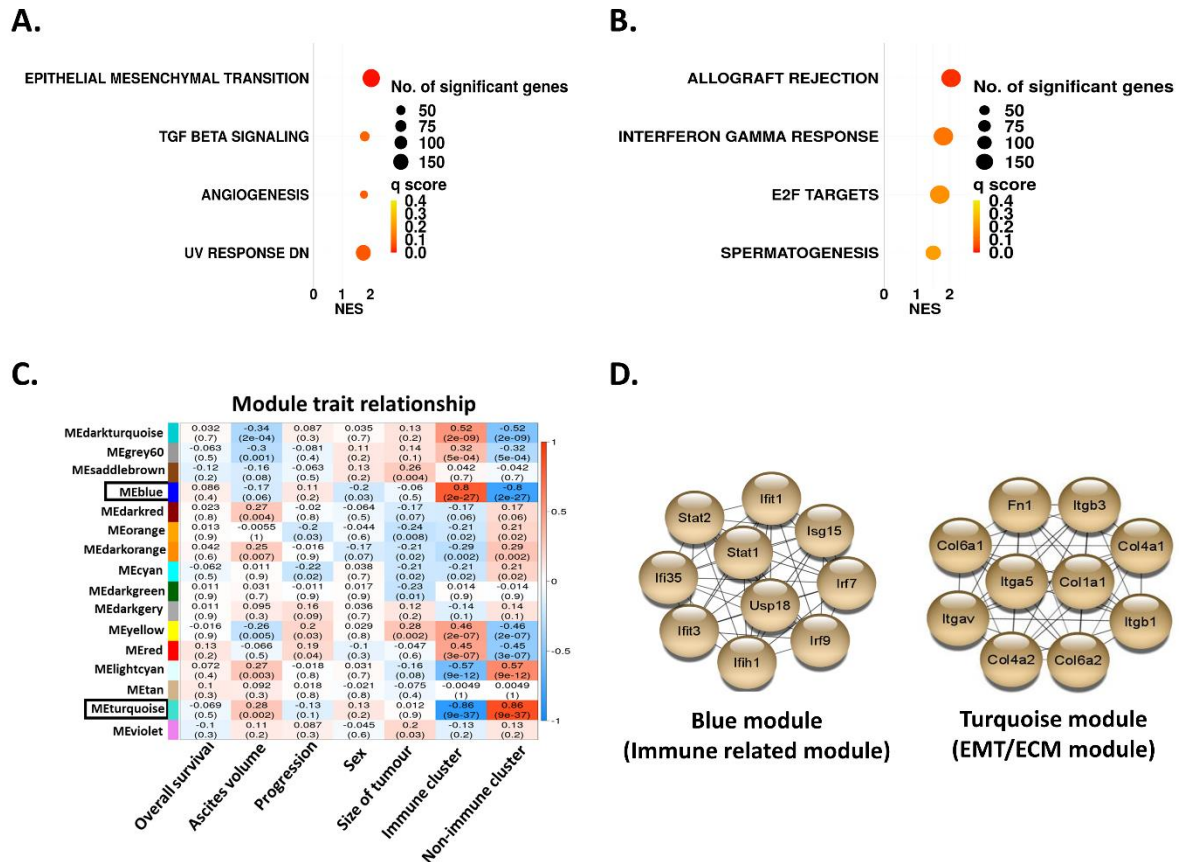

**Fig. S9. Gene set enrichment analysis (GSEA) and weighted correlation network analysis (WGCNA) performed on single tumours from each mouse indicate similar genetic profile and hub genes for all tumours. (A and B) GSEA on a single tumour per mouse using MSigDB database. Number of genes per gene set is shown by size of circles and colours of circle correspond to q score (FDR) value per each gene set signature. (C) Correlation matrix of modules constructed by WGCNA and correlated with mice phenotypic traits and immune and non-immune cluster. (D) Hub genes identified from significant WGCNA modules, Turquoise and Blue modules.**

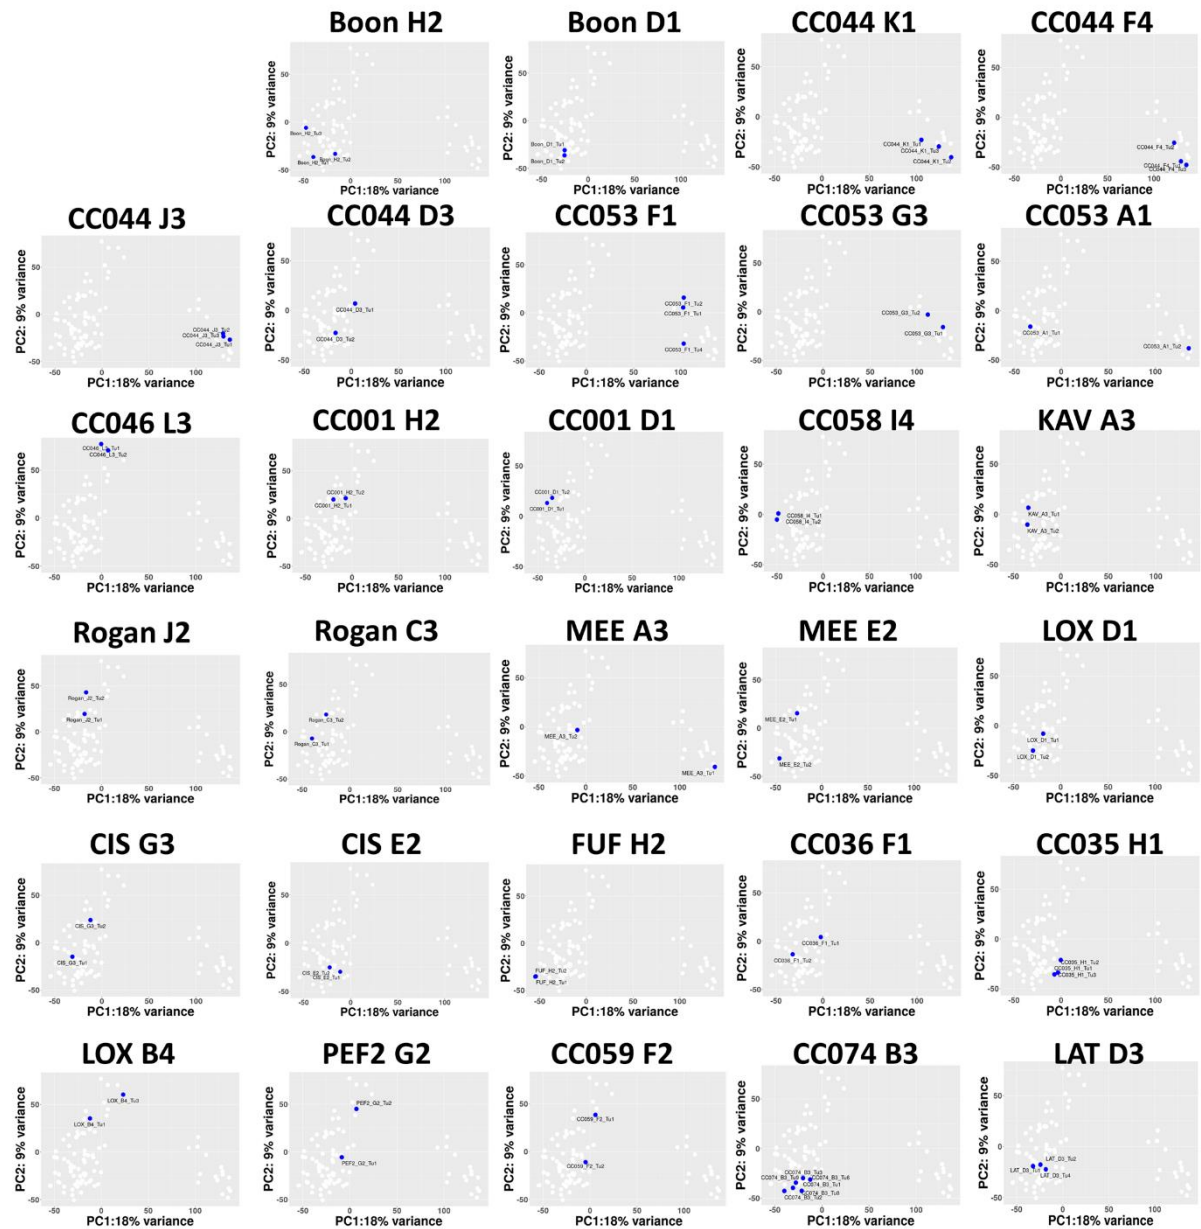

**Fig. S10.** RNA sequencing data from tumours harvested from mice with multiple tumours show similar gene expression profiles within each mouse. CCMT mouse-specific PCA plots demonstrating tumours harvested from the same mouse (blue dots).

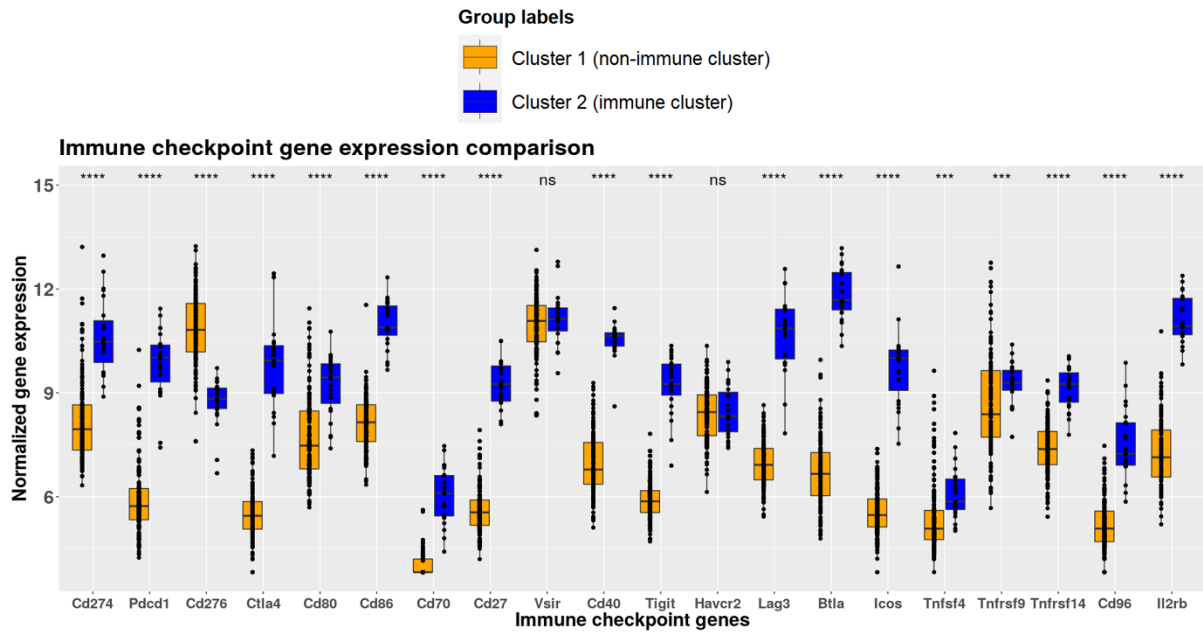

**Fig. S11. Differential expression of immune checkpoint genes between CCMT tumour clusters.** Normalised gene count was used to compare ICB related gene expression profiles between tumours from Cluster 1 (orange) with Cluster 2 (blue).  $P < 0.05$  was considered significant.  $P < 0.05$  \*,  $P < 0.01$  \*\*,  $P < 0.001$  \*\*\*,  $P < 0.0001$  \*\*\*\*. n.s. not significant. Box and whiskers plots show median and interquartile range.

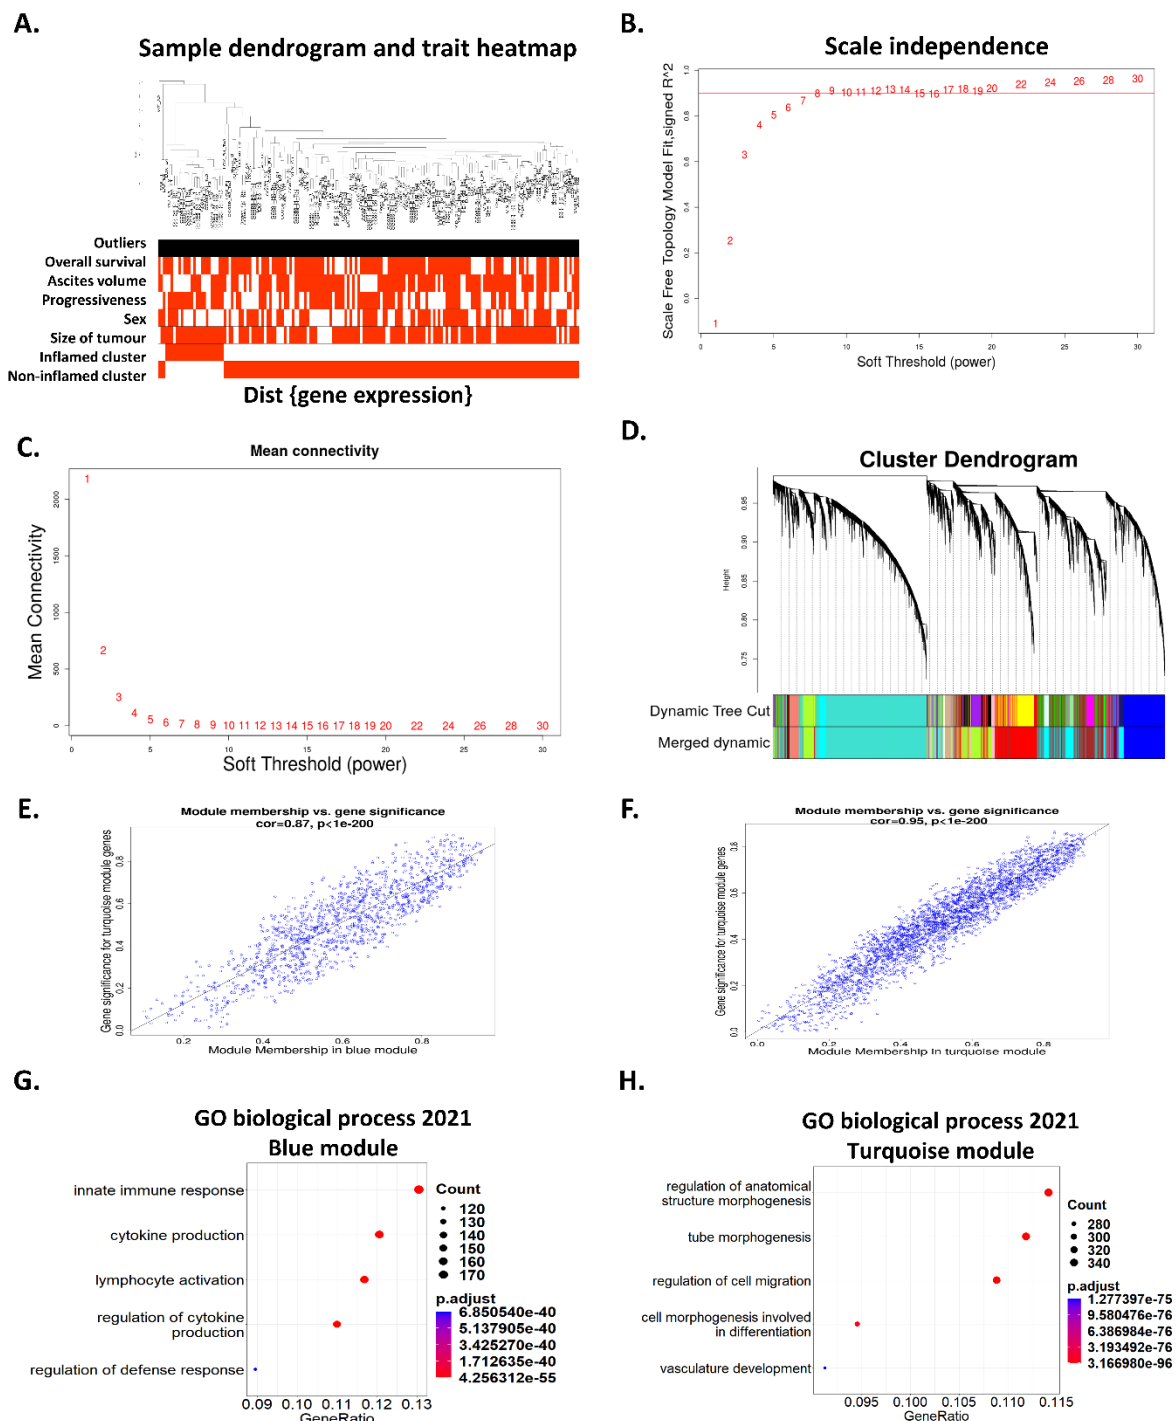

**Fig. S12. Weighted correlation network analysis (WGCNA) demonstrated two significant modules associated with CCMT immune tumour cluster. (A)** Samples dendrogram. Red and white bars correspond to variations in phenotypic traits in immune and non-immune tumour clusters. **(B)** Selection of “soft threshold power” based on scale-free topology analysis results to ensure scale-free network for subsequent analysis. **(C)** Mean connectivity for various soft-thresholding powers. **(D)** WGCNA cluster dendrogram demonstrates 10 colour coded modules identified by merging highly correlated modules that were primarily determined by the Dynamic Tree Cut algorithm. Grey colour corresponds to genes were not assigned to a module. **(E and F)** Module membership versus gene significance plots of Blue and Turquoise modules. **(G and H)** Functional annotation of the top 10 most significant terms identified in the Blue and Turquoise modules respectively.

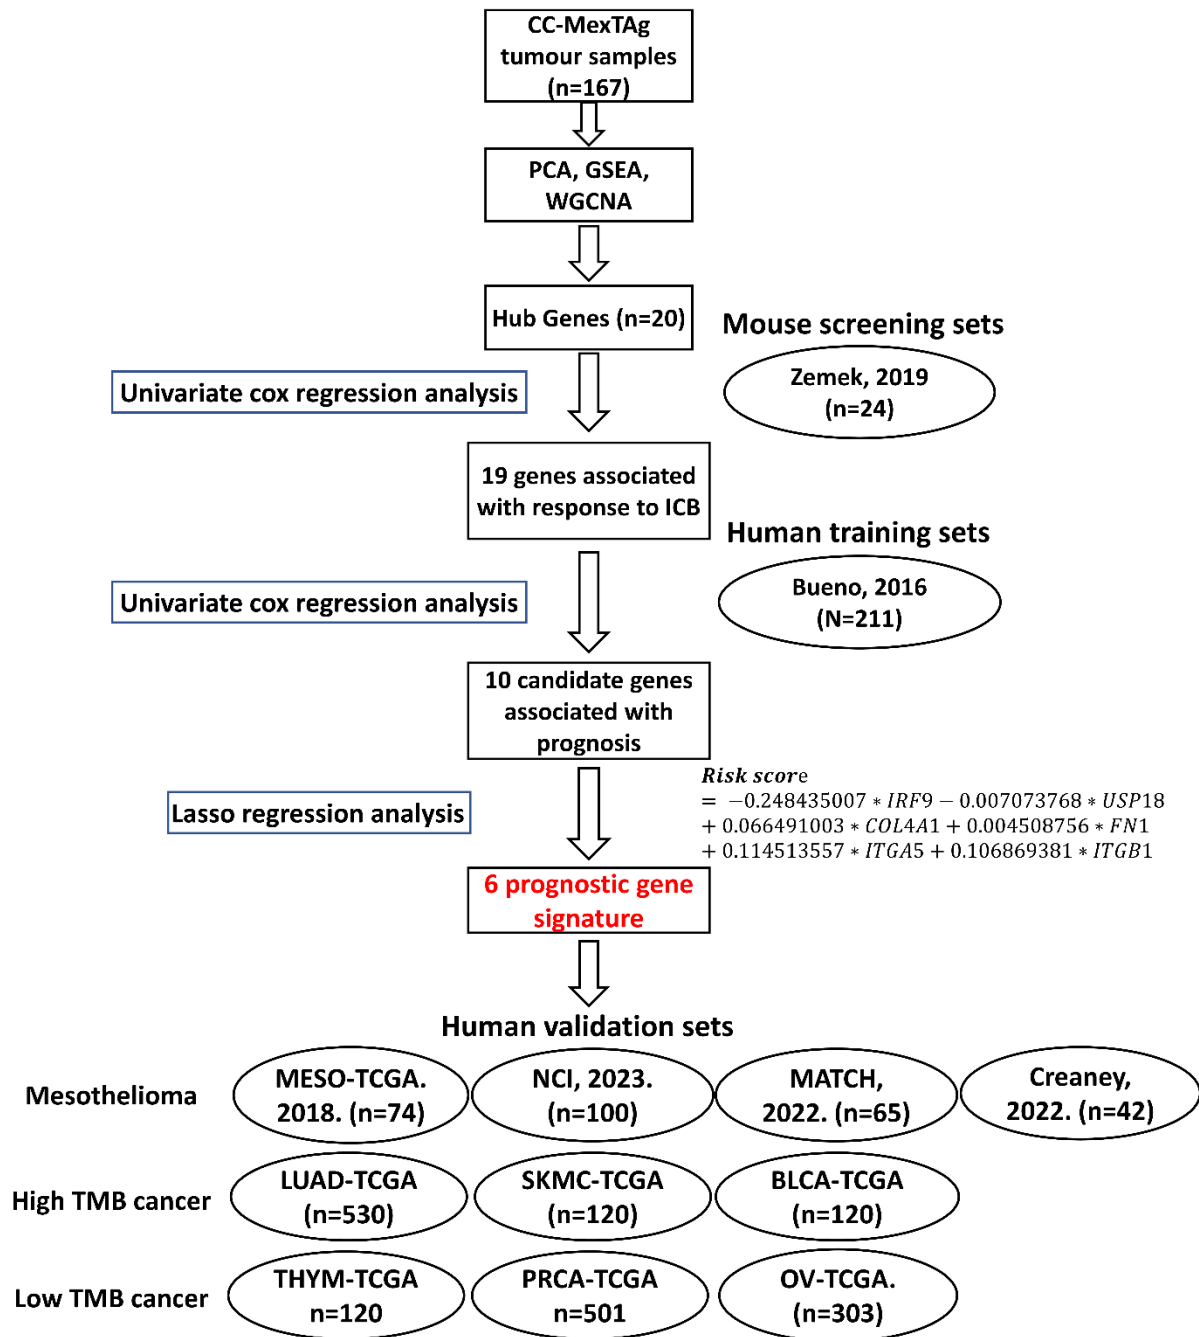

**Fig. S13. Six-gene mesothelioma specific gene signature study workflow.** Hub genes identified in CCMT tumours were screened against immune checkpoint blockade (ICB) treated mouse mesothelioma tumours. The Bueno human mesothelioma dataset was used as a training set to develop a 6-gene signature to predict mesothelioma prognosis. Four independent mesothelioma cohorts were used as validation sets to evaluate predictive performance of the gene signature. This model was also evaluated with other high and low TMB cancers.

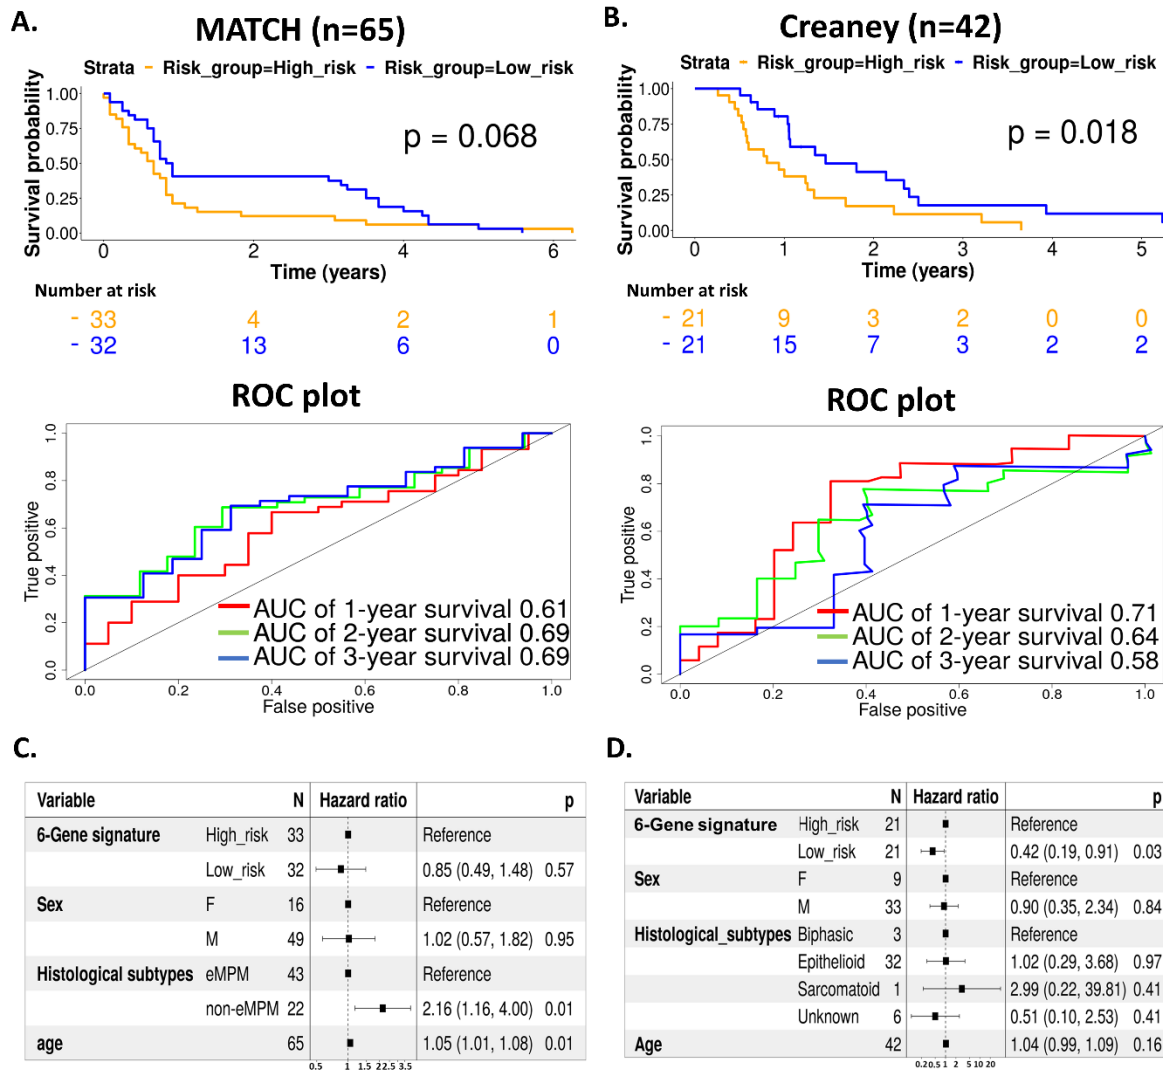

**Fig. S14. Kaplan Meier and ROC plots of MATCH and Creaney cohorts demonstrated differences in capacity of the 6-gene signature to predict outcome. (A and B)** Kaplan Meier curve and ROC plots of MATCH (n=65) and Creaney cohorts (n=42) comparing high (orange) versus low (blue) risk groups of mesothelioma patients. ROC plot of MATCH (left) and Creaney (right) are shown for 1, 2, 3-year survival. **(C and D)** Forrest plot of multivariate Cox regression analysis of the gene signature in MATCH (left) and Creaney (right) datasets. Multivariate analyses were adjusted for sex, histological subtypes and age of patients. For MATCH datasets, histological subtypes were only defined as epithelioid (eMPM) and non-epithelioid (non-eMPM) subtypes. Hazard ratio, (confidence interval) and P values are shown on the right end column of the table.

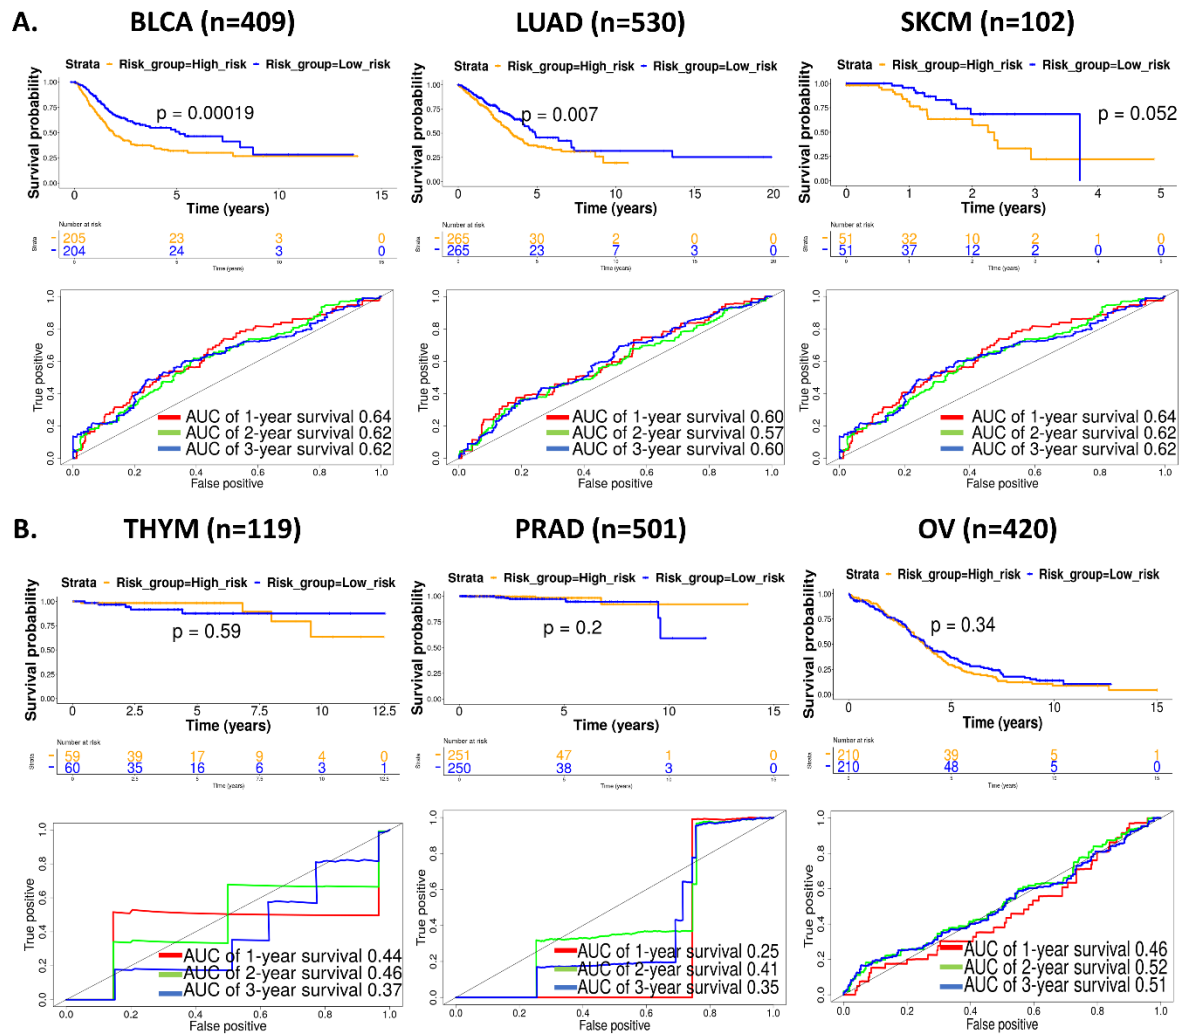

**Fig. S15. Comparison of the prognostic efficacy of our 6-gene mesothelioma signature in other non-mesothelioma cancers. (A and B)** Kaplan Meier and ROC curves of survival prediction by gene signature model using TCGA datasets of high TMB cancers, Bladder cancer (BLCA), Lung adenocarcinoma (LUAD) and Skin cutaneous melanoma (SKCM). **(C and D)** Kaplan Meier and ROC curves of survival prediction by gene signature model using TCGA datasets of low TMB cancers, Thymoma (THYM), Prostate adenocarcinoma (PRAD) and Ovarian cancer (OV).

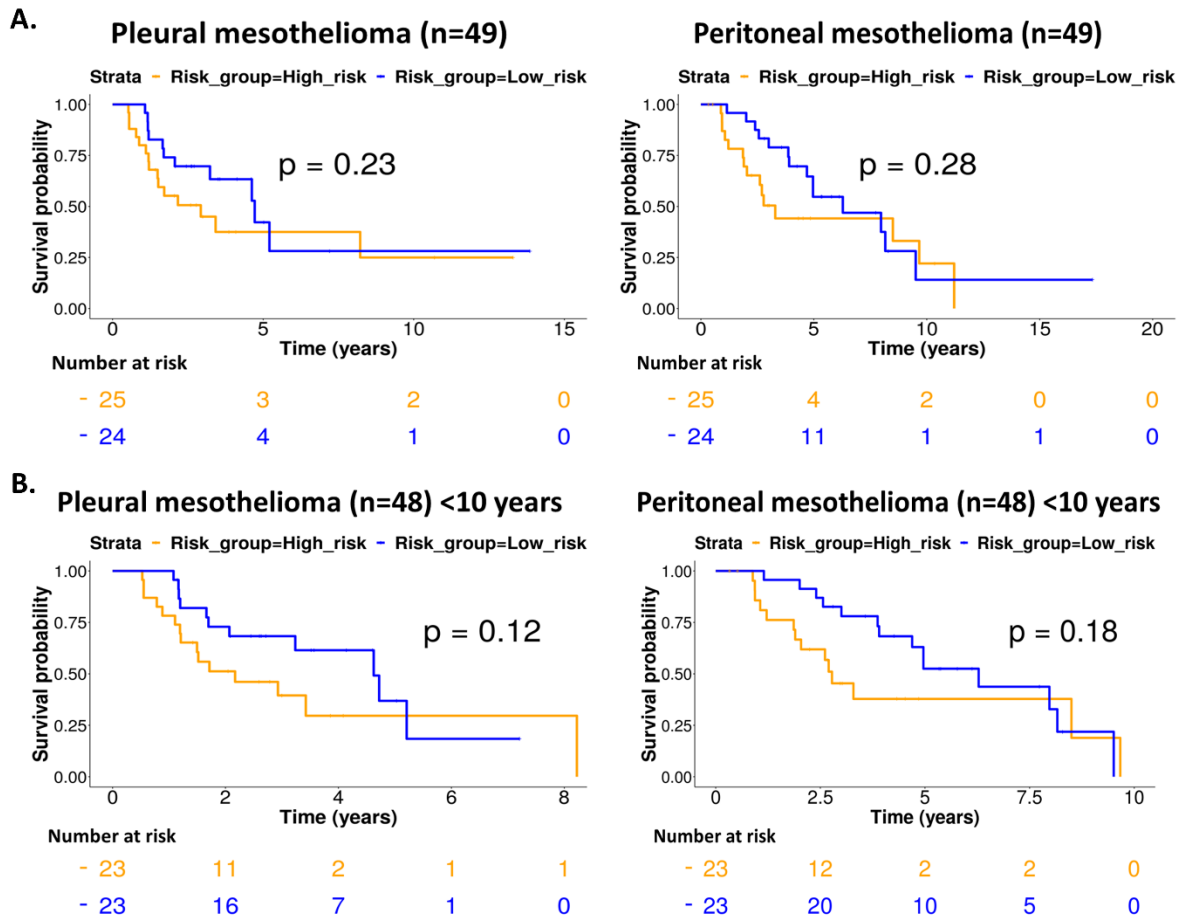

**Fig. S16. Mesothelioma-specific 6-gene signature could not predict survival stratified on anatomical location. (A)** Kaplan Meier curves of survival prediction by the 6-gene signature in pleural and peritoneal groups of all patients and **(B)** patients with less than 10 years survival in NCI mesothelioma cohort.

**Table S1. Antibody specification, protein target and staining parameters for each multiplex immunofluorescence (mIF) panel.** Goat anti-Rabbit IgG (H+L) was used as a secondary antibody.

| Antibody target   | Catalog number, Manufacturer                       | Clone number |
|-------------------|----------------------------------------------------|--------------|
| <b>CD4</b>        | 25229S, Cell signaling                             | D7D2Z        |
| <b>CD8a</b>       | 98941, Cell signaling                              | D4W2Z        |
| <b>FoxP3</b>      | 12653, Cell signaling                              | D6O8R        |
| <b>PD-L1</b>      | ab213480, Abcam                                    | EPR20529     |
| <b>CD19</b>       | 90176, Cell signaling                              | D4V4B        |
| <b>IBA1</b>       | 019-19741, FUJIFILM Wako Pure Chemical Corporation | Polyclonal   |
| <b>COL1A1</b>     | 72026T, Cell signaling                             | E8F4L        |
| <b>Vimentin</b>   | 5741T, Cell signaling                              | D21H3        |
| <b>PDPN</b>       | ab109059, Abcam                                    | Polyclonal   |
| <b>E-cadherin</b> | 3195S, Cell signaling                              | 24E10        |

**Panel 1 (T cell and checkpoint)**

| Function                 | Antigen | Step | Dilution (working conc ug/ml) | TSA-Fluorophores reagent (dilution), incubation time |
|--------------------------|---------|------|-------------------------------|------------------------------------------------------|
| <b>T cell markers</b>    | CD4     | 1    | 1/800 (0.19)                  | Cy5 (1/200), 5 min                                   |
|                          | CD8a    | 2    | 1/800 (0.125)                 | AF594 (1/200), 5 min                                 |
|                          | FoxP3   | 3    | 1/400 (1.25)                  | Cy3 (1/100), 10 min                                  |
| <b>Immune checkpoint</b> | PD-L1   | 4    | 1/400 (1.27)                  | FITC (1/50), 10 min                                  |

**Panel 2 (immune)**

| Function                     | Antigen | Step | Dilution (working conc ug/ml) | TSA-Fluorophores reagent (dilution), incubation time |
|------------------------------|---------|------|-------------------------------|------------------------------------------------------|
| <b>T cell markers</b>        | CD4     | 1    | 1/800 (0.19)                  | Cy5 (1/200), 5 min                                   |
|                              | CD8a    | 2    | 1/800 (0.125)                 | AF594 (1/200), 5 min                                 |
| <b>B cell marker</b>         | CD19    | 3    | 1/400 (0.1)                   | FITC (1/50), 10 min                                  |
| <b>Pan macrophage marker</b> | IBA1    | 4    | 1/800 (1.27)                  | Cy3 (1/200), 5 min                                   |

**Panel 3 (EMT/ECM/Mesothelioma)**

| Function                   | Antigen    | Step | Dilution (working conc ug/ml) | TSA-Fluorophores reagent (dilution), incubation time |
|----------------------------|------------|------|-------------------------------|------------------------------------------------------|
| <b>ECM marker</b>          | COL1A1     | 1    | 1/400 (0.03)                  | Cy5 (1/100), 10 min                                  |
| <b>EMT marker</b>          | Vimentin   | 2    | 1/400 (0.11)                  | Cy3 (1/50), 10 min                                   |
| <b>Mesothelioma marker</b> | PDPN       | 3    | 1/400 (2.5)                   | AF594 (1/50), 10 min                                 |
| <b>EMT marker</b>          | E-cadherin | 4    | 1/800 (0.06)                  | FITC (1/50), 10 min                                  |

**Table S2. List of immune checkpoint genes for gene expression analysis.**

| <b>RNAseq<br/>Gene symbols</b> | <b>Aliases</b>      | <b>Function of encoded protein in cancer</b>                                                                           |
|--------------------------------|---------------------|------------------------------------------------------------------------------------------------------------------------|
| <i>Cd274</i>                   | PD-L1, B7-H1        | Transmembrane protein expressed on tumour and APC suppressing T cell mediated immune response                          |
| <i>Pdcd1</i>                   | PD-1, Pdc1          | Immune inhibitory receptor expressed on T and B cells suppressing T cell mediated immune response                      |
| <i>Cd276</i>                   | B7-H3, B7RP-2       | Transmembrane protein expressed on Tumour cells. Contributes to T cell mediated immune response                        |
| <i>Ctla4</i>                   | Cd152               | Protein receptor mostly upregulated on activated T cells. Contributes to inhibition of T cell mediated immune response |
| <i>Cd80</i>                    | B7-1                | Membrane protein expressed on T cell, B cells and APC and is a ligand for Ctla4 and CD28 protein                       |
| <i>Cd86</i>                    | B7-2                | Membrane protein expressed on B cells, macrophages, dendritic cells and is a ligand for Ctla4 and CD28 protein         |
| <i>Cd70</i>                    | Cd271, Tnfsf7       | Cytokine protein ligand binds to CD27 protein                                                                          |
| <i>Cd27</i>                    | Tnfrsf7, S152, Tp55 | TNF-receptor protein acts as a co-stimulatory immune checkpoint protein expressed on T , NK and B cells                |
| <i>Vsir</i>                    | Vista, B7-H5        | Immunoregulatory receptor protein inhibits T cell response and cytokine production expressed on T and B cells          |
| <i>Cd40</i>                    | Bp50, Tnfrsf5       | TNF-receptor protein mediating immune and inflammatory response                                                        |
| <i>Tigit</i>                   | Vsig9, Vstm3        | Transmembrane receptor, acts as a co-inhibitory immune checkpoint expressed on T and NK cells                          |
| <i>Havcr2</i>                  | Tim3, Cd366         | Transmembrane protein involved in CD8 T cell exhaustion and expressed on T cells and Myeloid cells                     |
| <i>Lag3</i>                    | Cd223               | Transmembrane protein involved in CD8 T cell exhaustion and Treg activation expressed on T, B, NK and Dendritic cells  |
| <i>Btla</i>                    | Cd272               | Transmembrane glycoprotein contributed to immune suppression and expressed on T, B and dendritic cells                 |
| <i>Icos</i>                    | Ailim, Cd278        | Cell surface receptor for Ctla4 and Cd28, expressed on activated T cells                                               |
| <i>Tnfsf4</i>                  | Cd252, Ox40l        | Cytokine binds to TNFRSF4, functions as Immune checkpoint co-stimulator mediating T cells binding to endothelial cells |
| <i>Tnfrsf9</i>                 | Cd137, 4-1BB        | TNF family receptor protein function as immune checkpoint co-stimulator expressed on activated T cells                 |
| <i>Tnfrsf14</i>                | Hvem, Tr2, Cd270    | Cell surface receptor protein binds to TNF receptor associated factor (TRAF) activating T-cell immune response         |
| <i>Cd96</i>                    | Tactile             | Cell surface receptor protein expressed on T and NK cells and may play role on activation of immune cells adhesion     |
| <i>Il2rb</i>                   | IL15RB, Cd122       | Cell surface receptor protein that is involved in T cell immune response                                               |

**Table S3. Tables of Area Under the ROC Curve (AUC) of gene signatures for survival years (year 1, 2, 3) and p values of the comparison between AUCs of the 6-gene signature against the other gene signatures.** Each table refers to AUCs and p values of gene signatures calculated within each mesothelioma datasets (Bueno, TCGA, NCI, MATCH and Creaney). AUC values of every survival year are compared within each datasets using the iid-representation of the AUC estimator from TimeROC package. P value <0.05 \*, Pvalue <0.01 \*\*.

| Bueno                 |      |        |         | TCGA                  |      |        |                | NCI                   |      |        |         |
|-----------------------|------|--------|---------|-----------------------|------|--------|----------------|-----------------------|------|--------|---------|
| Gene signature        | AUC  | Year   | P value | Gene signature        | AUC  | Year   | P value        | Gene signature        | AUC  | Year   | P value |
| 6-gene signature      | 0.68 | Year 1 | NA      | 6-gene signature      | 0.68 | Year 1 | NA             | 6-gene signature      | 0.84 | Year 1 | NA      |
| 6-gene signature      | 0.71 | Year 2 | NA      | 6-gene signature      | 0.82 | Year 2 | NA             | 6-gene signature      | 0.71 | Year 2 | NA      |
| 6-gene signature      | 0.75 | Year 3 | NA      | 6-gene signature      | 0.87 | Year 3 | NA             | 6-gene signature      | 0.72 | Year 3 | NA      |
| 44-gene signature     | 0.69 | Year 1 | 0.99    | 44-gene signature     | 0.74 | Year 1 | 0.777          | 44-gene signature     | 0.89 | Year 1 | 0.693   |
| 44-gene signature     | 0.76 | Year 2 | 0.56    | 44-gene signature     | 0.83 | Year 2 | 0.994          | 44-gene signature     | 0.77 | Year 2 | 0.680   |
| 44-gene signature     | 0.78 | Year 3 | 0.95    | 44-gene signature     | 0.90 | Year 3 | 0.955          | 44-gene signature     | 0.82 | Year 3 | 0.180   |
| Bai et.al signature   | 0.71 | Year 1 | 0.79    | Bai et.al signature   | 0.80 | Year 1 | 0.123          | Bai et.al signature   | 0.89 | Year 1 | 0.666   |
| Bai et.al signature   | 0.75 | Year 2 | 0.64    | Bai et.al signature   | 0.84 | Year 2 | 0.939          | Bai et.al signature   | 0.73 | Year 2 | 0.983   |
| Bai et.al signature   | 0.79 | Year 3 | 0.90    | Bai et.al signature   | 0.90 | Year 3 | 0.926          | Bai et.al signature   | 0.78 | Year 3 | 0.603   |
| Zhou et.al signature  | 0.62 | Year 1 | 0.43    | Zhou et.al signature  | 0.66 | Year 1 | 0.986          | Zhou et.al signature  | 0.75 | Year 1 | 0.739   |
| Zhou et.al signature  | 0.65 | Year 2 | 0.64    | Zhou et.al signature  | 0.63 | Year 2 | 0.056          | Zhou et.al signature  | 0.67 | Year 2 | 0.934   |
| Zhou et.al signature  | 0.62 | Year 3 | 0.19    | Zhou et.al signature  | 0.67 | Year 3 | <b>0.008**</b> | Zhou et.al signature  | 0.67 | Year 3 | 0.893   |
| Zhang et.al signature | 0.63 | Year 1 | 0.24    | Zhang et.al signature | 0.80 | Year 1 | 0.059          | Zhang et.al signature | 0.83 | Year 1 | 0.987   |
| Zhang et.al signature | 0.72 | Year 2 | 0.98    | Zhang et.al signature | 0.84 | Year 2 | 0.982          | Zhang et.al signature | 0.68 | Year 2 | 0.860   |
| Zhang et.al signature | 0.75 | Year 3 | 0.99    | Zhang et.al signature | 0.85 | Year 3 | 0.952          | Zhang et.al signature | 0.75 | Year 3 | 0.888   |
| Shi et.al signature   | 0.61 | Year 1 | 0.24    | Shi et.al signature   | 0.78 | Year 1 | 0.422          | Shi et.al signature   | 0.83 | Year 1 | 0.995   |
| Shi et.al signature   | 0.66 | Year 2 | 0.64    | Shi et.al signature   | 0.77 | Year 2 | 0.764          | Shi et.al signature   | 0.70 | Year 2 | 0.995   |
| Shi et.al signature   | 0.66 | Year 3 | 0.38    | Shi et.al signature   | 0.84 | Year 3 | 0.949          | Shi et.al signature   | 0.75 | Year 3 | 0.956   |
| Xiao et.al signature  | 0.68 | Year 1 | 0.84    | Xiao et.al signature  | 0.79 | Year 1 | 0.183          | Xiao et.al signature  | 0.82 | Year 1 | 0.970   |
| Xiao et.al signature  | 0.68 | Year 2 | 0.86    | Xiao et.al signature  | 0.87 | Year 2 | 0.660          | Xiao et.al signature  | 0.72 | Year 2 | 0.992   |
| Xiao et.al signature  | 0.68 | Year 3 | 0.43    | Xiao et.al signature  | 0.89 | Year 3 | 0.970          | Xiao et.al signature  | 0.76 | Year 3 | 0.918   |
| CCNB1 expression      | 0.65 | Year 1 | 0.84    | CCNB1 expression      | 0.75 | Year 1 | 0.697          | CCNB1 expression      | 0.83 | Year 1 | 0.994   |
| CCNB1 expression      | 0.73 | Year 2 | 0.97    | CCNB1 expression      | 0.79 | Year 2 | 0.967          | CCNB1 expression      | 0.69 | Year 2 | 0.992   |
| CCNB1 expression      | 0.77 | Year 3 | 0.99    | CCNB1 expression      | 0.86 | Year 3 | 0.994          | CCNB1 expression      | 0.75 | Year 3 | 0.936   |

  

| MATCH                 |      |        |         | Creaney               |      |        |         |
|-----------------------|------|--------|---------|-----------------------|------|--------|---------|
| Gene signature        | AUC  | Year   | P value | Gene signature        | AUC  | Year   | P value |
| 6-gene signature      | 0.61 | Year 1 | NA      | 6-gene signature      | 0.71 | Year 1 | NA      |
| 6-gene signature      | 0.69 | Year 2 | NA      | 6-gene signature      | 0.65 | Year 2 | NA      |
| 6-gene signature      | 0.69 | Year 3 | NA      | 6-gene signature      | 0.57 | Year 3 | NA      |
| 44-gene signature     | 0.70 | Year 1 | 0.379   | 44-gene signature     | 0.60 | Year 1 | 0.498   |
| 44-gene signature     | 0.74 | Year 2 | 0.739   | 44-gene signature     | 0.56 | Year 2 | 0.561   |
| 44-gene signature     | 0.74 | Year 3 | 0.701   | 44-gene signature     | 0.47 | Year 3 | 0.453   |
| Bai et.al signature   | 0.73 | Year 1 | 0.119   | Bai et.al signature   | 0.62 | Year 1 | 0.643   |
| Bai et.al signature   | 0.78 | Year 2 | 0.246   | Bai et.al signature   | 0.58 | Year 2 | 0.835   |
| Bai et.al signature   | 0.79 | Year 3 | 0.253   | Bai et.al signature   | 0.44 | Year 3 | 0.676   |
| Zhou et.al signature  | 0.62 | Year 1 | 0.993   | Zhou et.al signature  | 0.64 | Year 1 | 0.880   |
| Zhou et.al signature  | 0.62 | Year 2 | 0.612   | Zhou et.al signature  | 0.53 | Year 2 | 0.732   |
| Zhou et.al signature  | 0.62 | Year 3 | 0.596   | Zhou et.al signature  | 0.35 | Year 3 | 0.376   |
| Zhang et.al signature | 0.61 | Year 1 | 0.999   | Zhang et.al signature | 0.66 | Year 1 | 0.715   |
| Zhang et.al signature | 0.68 | Year 2 | 0.984   | Zhang et.al signature | 0.67 | Year 2 | 0.976   |
| Zhang et.al signature | 0.69 | Year 3 | 1.000   | Zhang et.al signature | 0.57 | Year 3 | 1.000   |
| Shi et.al signature   | 0.64 | Year 1 | 0.932   | Shi et.al signature   | 0.55 | Year 1 | 0.361   |
| Shi et.al signature   | 0.60 | Year 2 | 0.441   | Shi et.al signature   | 0.66 | Year 2 | 0.997   |
| Shi et.al signature   | 0.58 | Year 3 | 0.300   | Shi et.al signature   | 0.58 | Year 3 | 0.999   |
| Xiao et.al signature  | 0.64 | Year 1 | 0.864   | Xiao et.al signature  | 0.51 | Year 1 | 0.182   |
| Xiao et.al signature  | 0.69 | Year 2 | 1.000   | Xiao et.al signature  | 0.50 | Year 2 | 0.415   |
| Xiao et.al signature  | 0.69 | Year 3 | 0.995   | Xiao et.al signature  | 0.32 | Year 3 | 0.193   |
| CCNB1 expression      | 0.62 | Year 1 | 0.990   | CCNB1 expression      | 0.50 | Year 1 | 0.080   |
| CCNB1 expression      | 0.65 | Year 2 | 0.741   | CCNB1 expression      | 0.55 | Year 2 | 0.538   |
| CCNB1 expression      | 0.65 | Year 3 | 0.755   | CCNB1 expression      | 0.40 | Year 3 | 0.212   |

**Table S4. Tables of Area Under the ROC Curve (AUC) of gene signatures, p values and confidence intervals (95%) of comparison between the performance of 6-gene signature against the other gene signatures for prediction of response to immune checkpoint blockade (ICB) therapy and chemotherapy (CTX) in NCI mesothelioma datasets. AUCs of the performance of gene signatures to predict response to (A) ICB therapy and (B) Chemotherapy are shown for univariate prediction and multivariate prediction that was adjusted for the effect of age, sex and site of disease (pleural or peritoneal). P values and confidence intervals of the comparison between 6-gene signature against other gene signatures were calculated using roc.test function and ‘delong’ method from the pROC package. Pvalue <0.05\*, pvalue<0.01 \*\*.**

**A.**

**Univariate**

| Gene signature        | AUC      | P value       | Confidence interval |
|-----------------------|----------|---------------|---------------------|
| 6-gene signature      | 0.846154 | NA            | NA                  |
| 44-gene signature     | 0.846154 | 1.000         | (-0.15, 0.15 )      |
| SELECT prediction     | 0.910256 | 0.749         | (-0.45, 0.32 )      |
| Bai et.al signature   | 0.794872 | 0.513         | (-0.10, 0.20 )      |
| Zhou et.al signature  | 0.589744 | <b>0.021*</b> | (0.03, 0.47 )       |
| Zhang et.al signature | 0.769231 | 0.201         | (-0.04, 0.19 )      |
| Shi et.al signature   | 0.794872 | 0.455         | (-0.08, 0.18 )      |
| Xiao et.al signature  | 0.794872 | 0.810         | (-0.36, 0.46 )      |
| CCNB1 expression      | 0.641026 | <b>0.019*</b> | (0.03, 0.37)        |

**Multivariate**

| Gene signature        | AUC  | P value | Confidence interval |
|-----------------------|------|---------|---------------------|
| 6-gene signature      | 0.48 | NA      | NA                  |
| 44-gene signature     | 0.51 | 0.75    | (-0.18, 0.13)       |
| SELECT prediction     | 0.64 | 0.29    | (-0.44, 0.13)       |
| Bai et.al signature   | 0.66 | 0.09    | (-0.38, 0.03)       |
| Zhou et.al signature  | 0.43 | 0.62    | (-0.15, 0.25)       |
| Zhang et.al signature | 0.51 | 0.92    | (-0.58, 0.53)       |
| Shi et.al signature   | 0.51 | 0.92    | (-0.58, 0.53)       |
| Xiao et.al signature  | 0.51 | 0.82    | (-0.25, 0.20)       |
| CCNB1 expression      | 0.66 | 0.09    | (-0.38, 0.03)       |

**B.**

**Univariate**

| Gene signature        | AUC  | P value | Confidence interval |
|-----------------------|------|---------|---------------------|
| 6-gene signature      | 0.57 | NA      | NA                  |
| 44-gene signature     | 0.56 | 0.917   | (-0.24, 0.27)       |
| SELECT prediction     | 0.67 | 0.556   | (-0.43, 0.23 )      |
| Bai et.al signature   | 0.57 | 1.000   | (-0.28,0.28)        |
| Zhou et.al signature  | 0.46 | 0.622   | (-0.33, 0.55)       |
| Zhang et.al signature | 0.56 | 0.961   | (-0.53,0.56)        |
| Shi et.al signature   | 0.49 | 0.650   | (-0.25, 0.40)       |
| Xiao et.al signature  | 0.63 | 0.790   | (-0.52, 0.39)       |
| CCNB1 expression      | 0.54 | 0.855   | (-0.27, 0.32)       |

**Multivariate**

| Gene signature        | AUC  | P value | Confidence interval |
|-----------------------|------|---------|---------------------|
| 6-gene signature      | 0.58 | NA      | NA                  |
| 44-gene signature     | 0.49 | 0.754   | (-0.51, 0.70)       |
| SELECT prediction     | 0.60 | 0.865   | (-0.17,0.14)        |
| Bai et.al signature   | 0.56 | 0.870   | (-0.22,0.26)        |
| Zhou et.al signature  | 0.50 | 0.788   | (-0.52,0.69)        |
| Zhang et.al signature | 0.49 | 0.759   | (-0.52, 0.71)       |
| Shi et.al signature   | 0.62 | 0.748   | (-0.24, 0.17)       |
| Xiao et.al signature  | 0.52 | 0.848   | (-0.57, 0.70)       |
| CCNB1 expression      | 0.44 | 0.609   | (-0.41, 0.70)       |
